# Supplementary material for: Characteristics and usefulness of trunk muscle endurance tests on the Roman chair in healthy adults
Source: PeerJ. 2022 Dec 7;10:e14469. doi: 10.7717/peerj.14469 (PMC9745951; doi:10.7717/peerj.14469)
Supplement: Supplemental Information 1 [file peerj-10-14469-s001.xlsx]

## Sheet: List1
Gender	Age	Height	Weight	BMI	mEX_a	mEX_b	mFL_a	mFL_b	mLLM_a	mLLM_b	mRLM_a	mRLM_b	FLEX_a	FLEX_b	RLMLLM_a	RLMLLM_b	LLMEX_a	LLMEX_b	RLMEX_a	RLMEX_b	BorgEX_a	BorgEX_b	BorgFL_a	BorgFL_b	BorgLM_a	BorgLM_b
F	29	1.69	70	24.508945765204302	158	319	256	109	39	142	30	149	1620253164556960	0.34169278996865204	0.7692307692307693	1.0493e+16	0.2468354430379747	0.445141065830721	0.189873417721519	0.4670846394984326	13	10	15	13	17	15
F	30	1.66	61	22.136739730004358	137	187	60	76	30	68	27	57	0.43795620437956206	0.40641711229946526	0.9	0.8382352941176471	0.21897810218978103	0.36363636363636365	0.19708029197080293	0.3048128342245989	16	11	13	18	19	15
M	29	1.62	65.5	24.95808565767413	98	288	141	420	61	126	78	103	1.43878e+16	1.45833e+16	1278688524590160	0.8174603174603174	0.6224489795918368	0.4375	0.7959183673469388	0.3576388888888889	13	15	15	13	16	16
F	29	1.61	53	20.446742023841672	148	297	74	46	71	91	61	62	0.5	0.15488215488215487	0.8591549295774648	0.6813186813186813	0.4797297297297297	0.3063973063973064	0.41216216216216217	0.20875420875420875	15	13	17	16	13	17
F	27	1.63	63	23.711844630960897	119	283	36	172	51	144	45	122	0.3025210084033613	0.607773851590106	0.8823529411764706	0.8472222222222222	0.42857142857142855	0.508833922261484	0.37815126050420167	0.43109540636042404	14	13	18	13	14	14
F	41	1.7	69	23.87543252595156	54	303	24	121	24	107	24	141	0.4444444444444444	0.39933993399339934	1	1.31776e+16	0.4444444444444444	0.35313531353135313	0.4444444444444444	0.46534653465346537	10	8	14	12	15	10
F	22	1.62	54	20.576131687242793	222	661	304	246	108	141	70	217	1.36937e+16	0.3721633888048411	0.6481481481481481	1.53901e+16	0.4864864864864865	0.21331316187594554	0.3153153153153153	0.32829046898638425	17	13	13	14	18	16
F	22	1.69	59	20.65754000210077	265	645	112	65	43	126	50	87	0.4226415094339623	0.10077519379844961	1.16279e+16	0.6904761904761905	0.16226415094339622	0.19534883720930232	0.18867924528301888	0.13488372093023257	10	11	14	16	15	15
F	41	1.68	75	26.573129251700685	85	122	158	136	16	97	22	99	1.85882e+16	1.11475e+16	1375	1.02062e+16	0.18823529411764706	0.7950819672131147	0.25882352941176473	0.8114754098360656	17	13	14	17	19	18
F	38	1.61	63	24.3046178773967	182	309	317	355	66	117	38	181	1.74176e+16	1.14887e+16	0.5757575757575758	1547008547008540	0.3626373626373626	0.3786407766990291	0.2087912087912088	0.5857605177993528	13	9	14	10	11	12
F	45	1.64	65	24.167162403331353	183	189	347	71	64	127	55	178	1.89617e+16	0.37566137566137564	0.859375	1.40157e+16	0.34972677595628415	0.671957671957672	0.3005464480874317	0.9417989417989417	13	13	12	16	15	14
F	35	1.67	59	21.15529420201513	133	220	182	123	82	153	59	114	1368421052631570	0.5590909090909091	0.7195121951219512	0.7450980392156863	0.6165413533834586	0.6954545454545454	0.44360902255639095	0.5181818181818182	14	11	11	13	12	14
F	32	1.56	58	23.83300460223537	160	308	208	197	67	183	65	183	2022-03-01	0.6396103896103896	0.9701492537313433	1	0.41875	0.5941558441558441	0.40625	0.5941558441558441	12	11	13	13	15	14
F	29	1.7	69	23.87543252595156	102	231	135	174	49	154	68	147	1.32353e+16	0.7532467532467533	1.38776e+16	0.9545454545454546	0.4803921568627451	0.6666666666666666	0.6666666666666666	0.6363636363636364	11	8	11	12	12	9
F	32	1.64	54	20.077334919690664	125	315	138	107	54	111	42	77	1104	0.3396825396825397	0.7777777777777778	0.6936936936936937	0.432	0.3523809523809524	0.336	0.24444444444444444	16	14	15	16	17	15
F	33	1.67	73	26.175194521137367	116	252	501	265	54	149	74	172	4318965517241370	1.05159e+16	1.37037e+16	1.15436e+16	0.46551724137931033	0.5912698412698413	0.6379310344827587	0.6825396825396826	14	15	12	16	15	15
M	36	1.77	70	22.34351559258195	123	231	151	165	81	139	94	113	1.22764e+16	0.7142857142857143	1.16049e+16	0.8129496402877698	0.6585365853658537	0.6017316017316018	0.7642276422764228	0.48917748917748916	13	10	11	12	13	14
M	37	1.8	84	25.925925925925924	202	242	194	119	58	186	69	120	0.9603960396039604	0.49173553719008267	1.18966e+16	0.6451612903225806	0.2871287128712871	0.768595041322314	0.3415841584158416	0.49586776859504134	13	12	12	13	11	13
F	25	1.65	61	22.4058769513315	165	298	259	186	78	218	71	142	1.5697e+16	0.6241610738255033	0.9102564102564102	0.6513761467889908	0.4727272727272727	0.7315436241610739	0.4303030303030303	0.47651006711409394	16	15	16	14	17	16
M	38	1.88	85	24.049343594386603	129	285	250	390	80	132	81	167	1937984496124030	1368421052631570	10125	1.26515e+16	0.6201550387596899	0.4631578947368421	0.627906976744186	0.5859649122807018	9	9	9	9	11	9
M	34	1.87	83	23.735308416025617	70	154	92	162	45	128	39	93	1.31429e+16	1051948051948050	0.8666666666666667	0.7265625	0.6428571428571429	0.8311688311688312	0.5571428571428572	0.6038961038961039	12	9	15	10	12	9
F	33	1.65	48	17.63085399449036	228	862	330	422	122	160	142	170	1.44737e+16	0.4895591647331787	1.16393e+16	10625	0.5350877192982456	0.18561484918793503	0.6228070175438597	0.19721577726218098	13	12	11	13	13	14
F	32	1.65	70	25.71166207529844	91	169	74	57	31	64	38	66	0.8131868131868132	0.33727810650887574	1.22581e+16	103125	0.34065934065934067	0.378698224852071	0.4175824175824176	0.3905325443786982	13	7	11	10	18	12
F	21	1.69	50	17.506389832288786	270	1468	185	97	77	166	69	113	0.6851851851851852	0.06607629427792916	0.8961038961038961	0.6807228915662651	0.2851851851851852	0.11307901907356949	0.25555555555555554	0.07697547683923706	12	11	13	16	14	13
M	20	1.72	62	20.9572742022715	112	269	76	68	62	103	69	84	0.6785714285714286	0.2527881040892193	1.1129e+16	0.8155339805825242	0.5535714285714286	0.3828996282527881	0.6160714285714286	0.31226765799256506	13	11	15	16	14	13
F	29	1.62	73	27.815881725346742	129	145	67	89	65	104	75	86	0.5193798449612403	0.6137931034482759	1.15385e+16	0.8269230769230769	0.5038759689922481	0.7172413793103448	0.5813953488372093	0.593103448275862	11	13	15	14	16	15
M	39	1.73	76	25.393431120318084	155	386	80	285	136	315	108	264	0.5161290322580645	0.7383419689119171	0.7941176470588235	0.8380952380952381	0.8774193548387097	0.8160621761658031	0.6967741935483871	0.6839378238341969	17	14	14	16	15	16
F	26	1.67	71	25.458065904119906	115	309	156	139	52	131	66	136	1.35652e+16	0.44983818770226536	1.26923e+16	1.03817e+16	0.45217391304347826	0.42394822006472493	0.5739130434782609	0.4401294498381877	14	8	13	9	11	10
F	21	1.59	58	22.942130453700404	203	456	120	297	61	263	83	126	0.5911330049261084	0.6513157894736842	1360655737704910	0.4790874524714829	0.30049261083743845	0.5767543859649122	0.4088669950738916	0.27631578947368424	12	10	13	13	14	12
F	23	1.61	47	18.132016511708652	98	322	189	118	51	196	68	109	1.92857e+16	0.36645962732919257	1.33333e+16	0.5561224489795918	0.5204081632653061	0.6086956521739131	0.6938775510204082	0.3385093167701863	12	10	13	16	18	14
M	45	1.85	108	31.55588020452885	77	164	91	120	60	119	58	99	1.18182e+16	0.7317073170731707	0.9666666666666667	0.8319327731092437	0.7792207792207793	0.725609756097561	0.7532467532467533	0.6036585365853658	10	10	11	12	13	11
M	30	1.76	62	20.015495867768596	178	283	70	68	48	168	71	117	0.39325842696629215	0.24028268551236748	1.47917e+16	0.6964285714285714	0.2696629213483146	0.5936395759717314	0.398876404494382	0.4134275618374558	11	11	14	13	13	11
M	42	1.81	77	23.503556057507403	122	326	183	618	68	183	51	231	2022-05-01	1.89571e+16	0.75	1.2623e+16	0.5573770491803278	0.5613496932515337	0.4180327868852459	0.7085889570552147	13	11	11	9	15	12
F	38	1.67	57	20.43816558499767	130	232	279	105	36	91	40	78	2146153846153840	0.4525862068965517	1.11111e+16	0.8571428571428571	0.27692307692307694	0.3922413793103448	0.3076923076923077	0.33620689655172414	13	10	9	10	17	13
F	30	1.59	70	27.688778133776353	99	148	70	68	46	88	52	69	0.7070707070707071	0.4594594594594595	1.13043e+16	0.7840909090909091	0.46464646464646464	0.5945945945945946	0.5252525252525253	0.46621621621621623	17	15	19	17	15	13
F	31	1.74	57	18.826793499801823	209	487	121	68	58	75	67	77	0.5789473684210527	0.13963039014373715	1.15517e+16	1.02667e+16	0.27751196172248804	0.1540041067761807	0.32057416267942584	0.15811088295687886	12	11	12	15	13	17
F	33	1.78	64	20.199469763918696	198	280	129	97	44	86	54	89	0.6515151515151515	0.3464285714285714	1.22727e+16	1.03488e+16	0.2222222222222222	0.30714285714285716	0.2727272727272727	0.31785714285714284	13	10	12	12	15	13
M	33	1.92	88	23.87152777777778	124	346	170	431	100	231	101	265	1.37097e+16	1245664739884390	2022-01-01	1147186147186140	0.8064516129032258	0.6676300578034682	0.8145161290322581	0.7658959537572254	18	17	16	15	17	17
M	30	1.8	66	20.37037037037037	104	281	177	140	97	137	116	159	1.70192e+16	0.498220640569395	1.19588e+16	1.16058e+16	0.9326923076923077	0.4875444839857651	1.11538e+16	0.5658362989323843	17	15	12	18	15	12
F	41	1.62	56	21.338210638622158	125	331	182	264	42	95	49	91	1456	0.797583081570997	1.16667e+16	0.9578947368421052	0.336	0.28700906344410876	0.392	0.27492447129909364	17	16	15	14	17	17
F	43	1.61	85	32.79194475521777	66	261	144	328	14	108	7	71	2.18182e+16	1.2567e+16	0.5	0.6574074074074074	0.21212121212121213	0.41379310344827586	0.10606060606060606	0.2720306513409962	17	16	15	14	19	18
F	27	1.68	51	18.069727891156464	215	1425	357	1438	120	389	101	260	1.66047e+16	1.00912e+16	0.8416666666666667	0.6683804627249358	0.5581395348837209	0.2729824561403509	0.4697674418604651	0.1824561403508772	13	12	12	10	14	14
F	27	1.68	56	19.841269841269845	269	773	326	226	105	247	116	205	1211895910780660	0.2923673997412678	1.10476e+16	0.8299595141700404	0.3903345724907063	0.31953428201811124	0.4312267657992565	0.2652005174644243	15	14	14	16	14	15
F	33	1.76	61.5	19.8540805785124	117	207	200	195	77	116	87	164	1.7094e+16	0.9420289855072463	112987012987013	1.41379e+16	0.6581196581196581	0.5603864734299517	0.7435897435897436	0.7922705314009661	11	7	10	10	13	8
F	39	1.63	46.5	17.501599608566377	254	487	324	120	70	144	62	110	1.27559e+16	0.2464065708418891	0.8857142857142857	0.7638888888888888	0.2755905511811024	0.29568788501026694	0.2440944881889764	0.22587268993839835	11	10	12	15	15	13
M	30	1.86	82	23.702162099664697	123	223	359	158	93	109	99	130	2.9187e+16	0.7085201793721974	1064516129032250	1.19266e+16	0.7560975609756098	0.48878923766816146	0.8048780487804879	0.5829596412556054	12	16	14	15	14	15
F	20	1.69	60.5	21.182731697069432	176	386	147	264	120	160	112	113	0.8352272727272727	0.6839378238341969	0.9333333333333333	0.70625	0.6818181818181818	0.41450777202072536	0.6363636363636364	0.2927461139896373	12	12	15	13	14	13
F	29	1.69	55	19.257028815517668	263	396	276	142	51	136	55	102	1049429657794670	0.35858585858585856	1.07843e+16	0.75	0.19391634980988592	0.3434343434343434	0.20912547528517111	0.25757575757575757	15	13	13	17	19	17
F	29	1.71	62	21.20310522895934	168	323	201	342	81	85	86	87	1.19643e+16	1.05882e+16	1.06173e+16	1.02353e+16	0.48214285714285715	0.2631578947368421	0.5119047619047619	0.2693498452012384	10	12	12	13	12	13
M	30	1.78	72	22.724403484408533	59	156	71	71	76	71	48	80	1.20339e+16	0.4551282051282051	0.631578947368421	1.12676e+16	1.28814e+16	0.4551282051282051	0.8135593220338984	0.5128205128205128	13	11	14	13	12	13
F	20	1.67	57.5	20.617447739252036	218	346	274	187	96	154	84	148	1.25688e+16	0.5404624277456648	0.875	0.961038961038961	0.44036697247706424	0.44508670520231214	0.3853211009174312	0.4277456647398844	13	13	15	17	15	15
F	21	1.66	63	22.8625344752504	119	212	193	58	78	81	72	79	1.62185e+16	0.27358490566037735	0.9230769230769231	0.9753086419753086	0.6554621848739496	0.38207547169811323	0.6050420168067226	0.37264150943396224	14	12	16	14	15	13
F	28	1.74	75	24.772096710265558	99	128	88	97	39	83	16	72	0.8888888888888888	0.7578125	0.41025641025641024	0.8674698795180723	0.3939393939393939	0.6484375	0.16161616161616163	0.5625	13	11	11	11	17	15
F	28	1.64	51	18.961927424152293	245	360	238	121	129	207	111	167	0.9714285714285714	0.33611111111111114	0.8604651162790697	0.8067632850241546	0.5265306122448979	0.575	0.4530612244897959	0.4638888888888889	14	8	12	13	11	11
F	45	1.74	77.5	25.597833267274407	107	134	129	80	28	46	31	53	1205607476635510	0.5970149253731343	1.10714e+16	1.15217e+16	0.2616822429906542	0.34328358208955223	0.2897196261682243	0.39552238805970147	11	14	12	12	15	13
M	38	1.84	84.5	24.958648393194707	116	307	144	324	59	90	50	122	1.24138e+16	1.05537e+16	0.847457627118644	1.35556e+16	0.5086206896551724	0.2931596091205212	0.43103448275862066	0.3973941368078176	10	12	11	12	11	14
F	31	1.65	71.5	26.262626262626267	203	318	260	388	63	182	62	254	1.28079e+16	1220125786163520	0.9841269841269841	1.3956e+16	0.3103448275862069	0.5723270440251572	0.3054187192118227	0.7987421383647799	13	11	12	11	14	12
M	42	1.8	74	22.839506172839506	72	188	169	139	101	136	105	101	2.34722e+16	0.7393617021276596	1.0396e+16	0.7426470588235294	1.40278e+16	0.723404255319149	1.45833e+16	0.5372340425531915	18	14	16	16	17	15
F	38	1.73	76	25.393431120318084	137	327	131	193	52	147	40	126	0.9562043795620438	0.5902140672782875	0.7692307692307693	0.8571428571428571	0.3795620437956204	0.44954128440366975	0.291970802919708	0.3853211009174312	13	11	14	12	13	12
F	41	1.74	66	21.79944510503369	108	386	104	42	38	148	54	126	0.9629629629629629	0.10880829015544041	1.42105e+16	0.8513513513513513	0.35185185185185186	0.38341968911917096	0.5	0.32642487046632124	9	13	9	15	13	13
F	40	1.67	81.5	29.22299114346158	72	132	267	379	59	136	69	119	3.70833e+16	2871212121212120	1.16949e+16	0.875	0.8194444444444444	1.0303e+16	0.9583333333333334	0.9015151515151515	11	11	11	11	11	11
F	36	1.59	88	34.80874965389027	76	99	108	222	53	76	38	74	1.42105e+16	2242424242424240	0.7169811320754716	0.9736842105263158	0.6973684210526315	0.7676767676767676	0.5	0.7474747474747475	12	12	13	11	12	12
M	34	1.77	75.5	24.099077531999104	126	216	91	107	67	116	42	95	0.7222222222222222	0.49537037037037035	0.6268656716417911	0.8189655172413793	0.5317460317460317	0.5370370370370371	0.3333333333333333	0.4398148148148148	13	9	15	10	8	12
F	34	1.68	55	19.48696145124717	112	271	67	39	57	92	57	109	0.5982142857142857	0.14391143911439114	1	1184782608695650	0.5089285714285714	0.33948339483394835	0.5089285714285714	0.4022140221402214	12	10	14	14	11	12
F	44	1.65	55.5	20.38567493112948	125	265	51	99	34	75	15	82	0.408	0.37358490566037733	0.4411764705882353	1.09333e+16	0.272	0.2830188679245283	0.12	0.30943396226415093	9	12	13	14	11	14
F	20	1.64	57	21.192742415229034	127	269	78	62	59	100	57	56	0.6141732283464567	0.23048327137546468	0.9661016949152542	0.56	0.4645669291338583	0.37174721189591076	0.44881889763779526	0.20817843866171004	12	8	9	11	13	10
F	20	1.68	50	17.71541950113379	185	962	139	113	94	184	68	133	0.7513513513513513	0.11746361746361747	0.723404255319149	0.7228260869565217	0.5081081081081081	0.19126819126819128	0.3675675675675676	0.13825363825363826	13	7	15	13	12	10
F	21	1.72	74	25.013520822065985	81	182	114	141	85	136	67	99	1.40741e+16	0.7747252747252747	0.788235294117647	0.7279411764705882	1.04938e+16	0.7472527472527473	0.8271604938271605	0.5439560439560439	14	12	15	14	14	13
